# Supplementary material
Source: publisher figshare collection journal article supplement (https://gsajournals.figshare.com/articles/dataset/_/23938038)
Supplement: Supplementary file 1 [file 1]

## Sheet: Sheet1
Plate	Barcode	Code	Accession Origin	Tissue Source	Species	Sex
AAC5HVNM5	TGACCT	309	Yugoslavia	Washington State University	Humulus lupulus var. lupulus	Female
AAC23HHM5	GATCATA	679	Australia	Washington State University	Humulus lupulus var. lupulus	Female
AAC23HHM5	ACCTGC	131	Australia	Washington State University	Humulus lupulus var. lupulus	Female
AAC5HVNM5	TTGACTA	570	Australia	Washington State University	Humulus lupulus var. lupulus	Female
AAC7WMGM5	TCGCGCA	319	Australia	Washington State University	Humulus lupulus var. lupulus	Female
AAC23HHM5	AGTCTGGT	93	Austria/Slovenia	USDA-ARS NCGR, Corvallis, Oregon	Humulus lupulus var. lupulus	Female
AAC5HV3M5	GTTAGC	351	Austria/Slovenia	Unknown	Humulus lupulus var. lupulus	Female
AAAYC7TM5	GCATTGA	225	Bavaria	Washington State University	Humulus lupulus var. lupulus	Male
AAAYC7TM5	CAGCGTA	103	Bavaria	Washington State University	Humulus lupulus var. lupulus	Male
AAC23HHM5	CGTAGTGT	595	Bavaria	Washington State University		Female
AAC23HHM5	AGAGCAAT	41	Bavaria	Washington State University		Female
AAC5HWMM5	CTTAGGTT	615	Bavaria	Washington State University	Humulus lupulus var. lupulus	Female
AAC7WMGM5	TCTTAAGT	34	Bavaria	Washington State University	Humulus lupulus var. lupulus	Female
AAAYCK2M5	CAGTTGA	95	Belgium	USDA-ARS NCGR, Corvallis, Oregon	Humulus lupulus var. lupulus	Female
AAAYCK2M5	ATTCAGT	295	Belgium	USDA-ARS NCGR, Corvallis, Oregon	Humulus lupulus var. lupulus	Female
AAC23HHM5	ATTGATC	518	Belgium	USDA-ARS NCGR, Corvallis, Oregon	Humulus lupulus var. lupulus	Female
AAC23GLM5	TCAGC	183	Canada	Clean Plant Center Northwest, Prosser, Washington	Humulus lupulus var. lupulus	Female
AAAYCK2M5	TCGTTAA	32	Czech Republic	USDA-ARS NCGR, Corvallis, Oregon	Humulus lupulus var. lupulus	Female
AAAYCK2M5	GCGTAAT	236	Czech Republic	USDA-ARS NCGR, Corvallis, Oregon	Humulus lupulus var. lupulus	Female
AAAYCK2M5	CCAGTC	462	Czech Republic	USDA-ARS NCGR, Corvallis, Oregon	Humulus lupulus var. lupulus	Female
AAAYCK2M5	CAGCGTA	323	Czech Republic	USDA-ARS NCGR, Corvallis, Oregon	Humulus lupulus var. lupulus	Female
AAAYCK2M5	ACGCCACT	743	Czech Republic	USDA-ARS NCGR, Corvallis, Oregon	Humulus lupulus var. lupulus	Female
AAC5HVNM5	TCGAGTGT	821	Czech Republic	Washington State University	Humulus lupulus var. lupulus	Female
AAC5HVNM5	CGTAGTGT	746	Czech Republic	USDA-ARS NCGR, Corvallis, Oregon	Humulus lupulus var. lupulus	Female
AAC5HWMM5	CGGAGT	74	Czech Republic	Washington State University	Humulus lupulus var. lupulus	Female
AAC7WMGM5	AGTCTAT	97	Czech Republic	Washington State University	Humulus lupulus var. lupulus	Female
AAAYCK2M5	TATGTAC	386	Serbia and Montenegro	USDA-ARS NCGR, Corvallis, Oregon	Humulus lupulus var. lupulus	Male
AAAYCK2M5	CGCCGAT	48	Serbia and Montenegro	USDA-ARS NCGR, Corvallis, Oregon	Humulus lupulus var. lupulus	Male
AAAYCK2M5	ACCGCT	303	France	USDA-ARS NCGR, Corvallis, Oregon	Humulus lupulus var. lupulus	Female
AAAYCK2M5	ACACGGT	745	France	USDA-ARS NCGR, Corvallis, Oregon	Humulus lupulus var. lupulus	Female
AAC23HHM5	CGTACC	727	France	Washington State University	Humulus lupulus var. lupulus	Female
AAAYCK2M5	TCTTGTGA	646	Germany	USDA-ARS NCGR, Corvallis, Oregon	Humulus lupulus var. lupulus	Female
AAAYCK2M5	AATGACGA	406	Germany	USDA-ARS NCGR, Corvallis, Oregon	Humulus lupulus var. lupulus	Female
AAAYCK2M5	ATGACGC	10	Germany	USDA-ARS NCGR, Corvallis, Oregon	Humulus lupulus var. lupulus	Female
AAAYCK2M5	ACTCCGC	138	Germany	USDA-ARS NCGR, Corvallis, Oregon	Humulus lupulus var. lupulus	Female
AAAYCK2M5	TCGCGCA	39	Germany	USDA-ARS NCGR, Corvallis, Oregon	Humulus lupulus var. lupulus	Female
AAAYCK2M5	CAAGAAGT	682	Germany	USDA-ARS NCGR, Corvallis, Oregon	Humulus lupulus var. lupulus	Female
AAAYCK2M5	CGGCTCA	240	Germany	USDA-ARS NCGR, Corvallis, Oregon	Humulus lupulus var. lupulus	Female
AAAYCK2M5	GATCGTGT	279	Germany	USDA-ARS NCGR, Corvallis, Oregon	Humulus lupulus var. lupulus	Female
AAAYCK2M5	GTACTGGT	541	Germany	USDA-ARS NCGR, Corvallis, Oregon	Humulus lupulus var. lupulus	Female
AAAYCK2M5	GTAGAGC	476	Germany	USDA-ARS NCGR, Corvallis, Oregon	Humulus lupulus var. lupulus	Female
AAAYCK2M5	TGCGCCGA	514	Germany	USDA-ARS NCGR, Corvallis, Oregon	Humulus lupulus var. lupulus	Female
AAC23GLM5	CTCCGA	561	Germany	Clean Plant Center Northwest, Prosser, Washington	Humulus lupulus var. lupulus	Female
AAC23HHM5	AATTGGC	526	Germany	Washington State University	Humulus lupulus var. lupulus	Female
AAC23HHM5	CATATGC	539	Germany	Washington State University	Humulus lupulus var. lupulus	Female
AAC23HHM5	TAAGCTT	6	Germany	Washington State University	Humulus lupulus var. lupulus	Female
AAC23HHM5	AGGTTAC	538	Germany	Washington State University		Female
AAC5HV3M5	TTCAAGT	288	Germany	Clean Plant Center Northwest, Prosser, Washington	Humulus lupulus var. lupulus	Female
AAC5HV3M5	GCTATAA	678	Germany	USDA-ARS NCGR, Corvallis, Oregon	Humulus lupulus var. lupulus	Female
AAC5HV3M5	ATCAGTT	754	Germany	Unknown	Humulus lupulus var. lupulus	Female
AAC5HVNM5	GCTTCGGA	677	Germany	Washington State University	Humulus lupulus var. lupulus	Female
AAC5HVNM5	CGACAGT	465	Germany	Washington State University	Humulus lupulus var. lupulus	Female
AAC5HVNM5	GCTAC	594	Germany	USDA-ARS NCGR, Corvallis, Oregon	Humulus lupulus var. lupulus	Female
AAC5HWMM5	TCAGC	346	Germany	Washington State University	Humulus lupulus var. lupulus	Female
AAC7WMGM5	CACGACT	831	Germany	Washington State University	Humulus lupulus var. lupulus	Female
AAC7WMGM5	CTTGAC	88	Germany	Washington State University	Humulus lupulus var. lupulus	Female
AAC7WMGM5	ATTCAGT	848	Germany	Washington State University	Humulus lupulus var. lupulus	Female
AAC7WMGM5	CAGTTGA	8	Germany	Washington State University	Humulus lupulus var. lupulus	Female
AAC7WMGM5	CAGCCT	473	Germany	Washington State University	Humulus lupulus var. lupulus	Female
AAC7WMGM5	TTAGACT	42	Germany	Washington State University	Humulus lupulus var. lupulus	Female
AAC7WMGM5	GCAGTTC	479	Germany	Washington State University	Humulus lupulus var. lupulus	Female
AAC5HV3M5	GCCATC	398	Hungary	Washington State University	Humulus lupulus var. lupulus	Female
AAC23HHM5	TTGCAC	357	Italy	Washington State University		Female
AAC5HVNM5	TGTTAC	24	Italy	Washington State University	Humulus lupulus var. lupulus	Female
AAC5HWMM5	TACGAGC	328	Italy	Washington State University	Humulus lupulus var. lupulus	Female
AAAYCK2M5	AAGAGACT	344	Japan	USDA-ARS NCGR, Corvallis, Oregon	Humulus lupulus var. lupulus	Female
AAC23HHM5	CGCCAT	662	Japan	Washington State University	Humulus lupulus var. lupulus	Female
AAC5HTKM5	GCTTAGC	813	Japan	Washington State University	Humulus lupulus var. lupulus	Female
AAC5HWMM5	GCTTAGC	488	Japan	Washington State University	Humulus lupulus var. lupulus	Female
AAC5HWMM5	CGTTATA	172	Japan	Washington State University	Humulus lupulus var. lupulus	Female
AAC5HWMM5	GTCACT	271	Japan	Washington State University	Humulus lupulus var. lupulus	Female
AAC5HWMM5	CATGC	689	Japan	USDA-ARS NCGR, Corvallis, Oregon	Humulus lupulus var. lupulus	Female
AAAYCK2M5	CACGACT	133	New Zealand	USDA-ARS NCGR, Corvallis, Oregon	Humulus lupulus var. lupulus	Female
AAAYCK2M5	AGTTCGA	65	New Zealand	USDA-ARS NCGR, Corvallis, Oregon	Humulus lupulus var. lupulus	Female
AAAYCK2M5	ATACAGGA	296	New Zealand	USDA-ARS NCGR, Corvallis, Oregon	Humulus lupulus var. lupulus	Female
AAAYCK2M5	GCAGTTC	879	New Zealand	USDA-ARS NCGR, Corvallis, Oregon	Humulus lupulus var. lupulus	Female
AAC5HWMM5	CAGTTA	117	New Zealand	Washington State University	Humulus lupulus var. lupulus	Female
AAC5HWMM5	AGGTTAC	608	New Zealand	Washington State University	Humulus lupulus var. lupulus	Female
AAC23HHM5	CCACCTGA	332	Poland	Washington State University	Humulus lupulus var. lupulus	Female
AAC5HVNM5	GCTGGAC	187	Poland	Washington State University	Humulus lupulus var. lupulus	Female
AAC5HWMM5	ACCTGC	453	Poland	Washington State University	Humulus lupulus var. lupulus	Female
AAC5HWMM5	CCACCTGA	448	Poland	Washington State University	Humulus lupulus var. lupulus	Female
AAC23GLM5	GATT	683	Russia		Humulus lupulus var. lupulus	Female
AAAYCK2M5	CGGCTGGA	380	Russia, Leningradskaja oblast	USDA-ARS NCGR, Corvallis, Oregon	Humulus lupulus var. lupulus	Female
AAAYCK2M5	CTAGCT	774	Serbia	USDA-ARS NCGR, Corvallis, Oregon	Humulus lupulus var. lupulus	Female
AAAYCK2M5	CCGAGCT	827	Serbia	Unknown	Humulus lupulus var. lupulus	Female
AAC5HV3M5	GATAGCT	395	Serbia	USDA-ARS NCGR, Corvallis, Oregon	Humulus lupulus var. lupulus	Female
AAAYCK2M5	GCCAGAT	464	Slovenia	USDA-ARS NCGR, Corvallis, Oregon	Humulus lupulus var. lupulus	Female
AAC5HTKM5	AAGTCTT	252	Slovenia	Washington State University	Humulus lupulus var. lupulus	Female
AAC5HVNM5	CGTTATA	163	Slovenia	USDA-ARS NCGR, Corvallis, Oregon	Humulus lupulus var. lupulus	Female
AAAYCK2M5	CTTAGAT	106	Slovenia, Žalec	USDA-ARS NCGR, Corvallis, Oregon	Humulus lupulus var. lupulus	Female
AAAYCK2M5	TTGCAGA	231	South Africa	USDA-ARS NCGR, Corvallis, Oregon	Humulus lupulus var. lupulus	Female
AAC5HVNM5	TCGGAT	475	South Africa	Washington State University	Humulus lupulus var. lupulus	Female
AAAYCK2M5	CGCTTAA	146	Switzerland	USDA-ARS NCGR, Corvallis, Oregon	Humulus lupulus var. lupulus	Female
AAC5HWMM5	TGAATC	118	Unknown	Washington State University	Humulus lupulus var. lupulus	Female
AAC2LYVM5	AGTTCGA	790	Ukraine	Washington State University	Humulus lupulus var. lupulus	Female
AAC5HV3M5	TCGGAT	771	Ukraine	Washington State University	Humulus lupulus var. lupulus	Female
AAC5HVNM5	CTATGC	690	Ukraine	Washington State University	Humulus lupulus var. lupulus	Female
AAC5HWMM5	ACGGCAT	535	Ukraine	Washington State University	Humulus lupulus var. lupulus	Female
AAAYCK2M5	CATGTTA	641	United Kingdom, England	USDA-ARS NCGR, Corvallis, Oregon	Humulus lupulus var. lupulus	Female
AAAYCK2M5	GACTATT	715	United Kingdom, England	USDA-ARS NCGR, Corvallis, Oregon	Humulus lupulus var. lupulus	Female
AAAYCK2M5	TTGATAC	577	United Kingdom, England	USDA-ARS NCGR, Corvallis, Oregon	Humulus lupulus var. lupulus	Female
AAAYCK2M5	ATCTAGC	722	United Kingdom, England	USDA-ARS NCGR, Corvallis, Oregon	Humulus lupulus var. lupulus	Female
AAAYCK2M5	TGAATTC	655	United Kingdom, England	USDA-ARS NCGR, Corvallis, Oregon	Humulus lupulus var. lupulus	Female
AAAYCK2M5	TACTGAT	619	United Kingdom, England	USDA-ARS NCGR, Corvallis, Oregon	Humulus lupulus var. lupulus	Female
AAAYCK2M5	AGGTCT	656	United Kingdom, England	USDA-ARS NCGR, Corvallis, Oregon	Humulus lupulus var. lupulus	Female
AAAYCK2M5	GCGA	116	United Kingdom, England	USDA-ARS NCGR, Corvallis, Oregon	Humulus lupulus var. lupulus	Female
AAAYCK2M5	AGGC	53	United Kingdom, England	USDA-ARS NCGR, Corvallis, Oregon	Humulus lupulus var. lupulus	Female
AAAYCK2M5	CCGACCAT	850	United Kingdom, England	USDA-ARS NCGR, Corvallis, Oregon	Humulus lupulus var. lupulus	Female
AAAYCK2M5	CTTGAC	156	United Kingdom, England	USDA-ARS NCGR, Corvallis, Oregon	Humulus lupulus var. lupulus	Female
AAAYCK2M5	CAGCCT	213	United Kingdom, England	USDA-ARS NCGR, Corvallis, Oregon	Humulus lupulus var. lupulus	Female
AAC23GLM5	GATGTC	80	United Kingdom, England	Washington State University	Humulus lupulus var. lupulus	Female
AAC23GLM5	GTTAGC	329	United Kingdom, England	Clean Plant Center Northwest, Prosser, Washington	Humulus lupulus var. lupulus	Female
AAC23GLM5	AATTGGC	430	United Kingdom, England	Clean Plant Center Northwest, Prosser, Washington	Humulus lupulus var. lupulus	Female
AAC23HHM5	TAGGTCA	725	United Kingdom, England	Washington State University	Humulus lupulus var. lupulus	Female
AAC23HHM5	CGTCA	550	United Kingdom, England	Washington State University	Humulus lupulus var. lupulus	Female
AAC23HHM5	TCAAGTT	55	United Kingdom, England	Washington State University	Humulus lupulus	Female
AAC23HHM5	CAGTTA	784	United Kingdom, England	Washington State University	Humulus lupulus	Female
AAC2LVKM5	CGCCTACA	839	United Kingdom, England	USDA-ARS Corvallis, Oregon	Humulus lupulus var. lupulus	Male
AAC2LVKM5	GTTAGC	510	United Kingdom, England	USDA-ARS Corvallis, Oregon	Humulus lupulus var. lupulus	Male
AAC2LYVM5	CGGCTCA	261	United Kingdom, England	Washington State University	Humulus lupulus var. lupulus	Female
AAC2LYVM5	CTAGCT	438	United Kingdom, England	Washington State University	Humulus lupulus var. lupulus	Female
AAC2LYVM5	ACCGGTC	269	United Kingdom, England	USDA-ARS NCGR, Corvallis, Oregon	Humulus lupulus var. lupulus	Female
AAC5HTKM5	GACGTGA	419	United Kingdom, England	Washington State University	Humulus lupulus var. lupulus	Female
AAC5HTKM5	GTCACT	477	United Kingdom, England	Washington State University	Humulus lupulus var. lupulus	Female
AAC5HVNM5	TGAATC	602	United Kingdom, England	Washington State University	Humulus lupulus var. lupulus	Female
AAC5HVNM5	GTTCCA	511	United Kingdom, England	Washington State University	Humulus lupulus var. lupulus	Female
AAC5HWMM5	GATAGCT	36	United Kingdom, England	Washington State University	Humulus lupulus var. lupulus	Female
AAC7WMGM5	ACTCCGC	369	United Kingdom, England	Washington State University	Humulus lupulus var. lupulus	Female
AAC7WMGM5	ATCTAGC	670	United Kingdom, England	Washington State University	Humulus lupulus var. lupulus	Female
AAC23HHM5	TGAATC	459	United Kingom, England	USDA-ARS NCGR, Corvallis, Oregon	Humulus lupulus var. lupulus	Female
AAAYCK2M5	GGCTAGA	237	United States, Arizona	USDA-ARS NCGR, Corvallis, Oregon	Humulus lupulus var. neomexicanus	Male
AAAYCK2M5	TGAGCGC	472	United States, Colorado	USDA-ARS NCGR, Corvallis, Oregon	Humulus lupulus var. neomexicanus	Female
AAAYCK2M5	TTCGCCA	664	United States, Colorado	USDA-ARS NCGR, Corvallis, Oregon	Humulus lupulus var. neomexicanus	Female
AAC5HVNM5	TTGGCA	575	United States, Colorado	USDA-ARS NCGR, Corvallis, Oregon	Humulus lupulus var. neomexicanus	Female
AAC7WMGM5	TGCGCCGA	528	United States, Colorado	Washington State University	Humulus lupulus var. lupulus	Female
AAAYCK2M5	AGAGCCT	109	United States, Idaho	USDA-ARS NCGR, Corvallis, Oregon	Humulus lupulus var. lupulus	Female
AAAYCK2M5	GGTGGCA	609	United States, Idaho	USDA-ARS NCGR, Corvallis, Oregon	Humulus lupulus var. lupulus	Male
AAC5HV3M5	ATTGATC	792	United States, Idaho	Washington State University	Humulus lupulus var. lupulus	Female
AAC5HWMM5	ACGTC	871	United States, Idaho	Washington State University	Humulus lupulus var. lupulus	Female
AAAYCK2M5	TCATGAC	870	United States, Massachusetts	USDA-ARS NCGR, Corvallis, Oregon	Humulus lupulus var. lupulus	Female
AAAYC7TM5	AGCTA	624	United States, Montana	Washington State University	Humulus lupulus var. lupulus	Male
AAC23GLM5	GTCACT	83	United States, Montana	Washington State University	Humulus lupulus var. lupulus	Female
AAC5HTKM5	CGTTATA	628	United States, Montana	Washington State University	Humulus lupulus var. lupulus	Female
AAC5HVNM5	GTACTC	270	United States, Montana	Washington State University	Humulus lupulus var. lupulus	Female
AAC5HWMM5	ATCAGAGA	410	United States, Montana	Washington State University	Humulus lupulus var. lupulus	Female
AAC2LVKM5	GCTGGAC	335	United States, Nebraska	Washington State University	Humulus lupulus var. lupulus	Male
AAC5HVNM5	GCATCC	531	United States, New Hampshire	Washington State University	Humulus lupulus var. lupulus	Female
AAC5HVNM5	CGCCAT	91	United States, New Hampshire	Washington State University	Humulus lupulus var. lupulus	Female
AAAYC7TM5	ATTAGCA	613	United States, North Dakota	Washington State University	Humulus lupulus var. lupulus	Male
AAAYC7TM5	GATCGTGT	836	United States, Oregon	USDA-ARS Corvallis, Oregon	Humulus lupulus var. lupulus	Male
AAAYC7TM5	GGTACAC	810	United States, Oregon	Washington State University	Humulus lupulus var. lupulus	Male
AAAYC7TM5	TCCACGC	102	United States, Oregon	USDA-ARS Corvallis, Oregon	Humulus lupulus var. lupulus	Male
AAAYC7TM5	TACTGAT	545	United States, Oregon	Washington State University	Humulus lupulus var. lupulus	Male
AAAYC7TM5	TCGTTAA	212	United States, Oregon	USDA-ARS Corvallis, Oregon	Humulus lupulus var. lupulus	Female
AAAYC7TM5	ATACAGGA	152	United States, Oregon	USDA-ARS Corvallis, Oregon	Humulus lupulus var. lupulus	Male
AAAYC7TM5	ATGCACC	247	United States, Oregon	Washington State University	Humulus lupulus var. lupulus	Male
AAAYC7TM5	GTACTGGT	214	United States, Oregon	USDA-ARS Corvallis, Oregon	Humulus lupulus var. lupulus	Male
AAAYC7TM5	TCTAGGA	866	United States, Oregon	USDA-ARS Corvallis, Oregon	Humulus lupulus var. lupulus	Male
AAAYC7TM5	GCGTAAT	62	United States, Oregon	Washington State University	Humulus lupulus var. lupulus	Male
AAAYC7TM5	GTAGAGC	162	United States, Oregon	USDA-ARS Corvallis, Oregon	Humulus lupulus var. lupulus	Male
AAAYC7TM5	GTCATCA	563	United States, Oregon	Washington State University	Humulus lupulus var. lupulus	Male
AAAYC7TM5	TATGTAC	494	United States, Oregon	Washington State University	Humulus lupulus var. lupulus	Male
AAAYC7TM5	AGGTCT	353	United States, Oregon	Washington State University	Humulus lupulus var. lupulus	Male
AAAYC7TM5	TCTTAAGT	54	United States, Oregon	Washington State University	Humulus lupulus var. lupulus	Male
AAAYC7TM5	TTAGACT	208	United States, Oregon	Washington State University	Humulus lupulus var. lupulus	Male
AAAYC7TM5	CTTAGAT	707	United States, Oregon	Washington State University	Humulus lupulus var. lupulus	Male
AAAYC7TM5	CCAGTC	215	United States, Oregon	Washington State University	Humulus lupulus var. lupulus	Male
AAAYC7TM5	CCTACCGA	611	United States, Oregon	Washington State University	Humulus lupulus var. lupulus	Male
AAAYC7TM5	TGGTTCGA	111	United States, Oregon	Washington State University	Humulus lupulus var. lupulus	Male
AAAYC7TM5	TTCGGAC	320	United States, Oregon	Washington State University	Humulus lupulus var. lupulus	Male
AAAYC7TM5	TGCAATA	337	United States, Oregon	USDA-ARS Corvallis, Oregon	Humulus lupulus var. lupulus	Male
AAAYC7TM5	GGCTAGA	219	United States, Oregon	Washington State University	Humulus lupulus var. lupulus	Male
AAAYC7TM5	AGTCTAT	305	United States, Oregon	Washington State University	Humulus lupulus var. lupulus	Male
AAAYC7TM5	AGTGGC	98	United States, Oregon	USDA-ARS Corvallis, Oregon	Humulus lupulus var. lupulus	Male
AAAYC7TM5	CGCAT	622	United States, Oregon	Washington State University	Humulus lupulus var. lupulus	Male
AAAYC7TM5	ATCTAGC	548	United States, Oregon	USDA-ARS Corvallis, Oregon	Humulus lupulus var. lupulus	Male
AAAYC7TM5	ATGACGC	290	United States, Oregon	Washington State University	Humulus lupulus var. lupulus	Male
AAAYC7TM5	CGTGAAT	701	United States, Oregon	Washington State University	Humulus lupulus var. lupulus	Male
AAAYC7TM5	TCTTGTGA	268	United States, Oregon	Washington State University	Humulus lupulus var. lupulus	Male
AAAYC7TM5	GGACCTT	778	United States, Oregon	Washington State University	Humulus lupulus var. lupulus	Male
AAAYC7TM5	ATATCGT	255	United States, Oregon	Washington State University	Humulus lupulus var. lupulus	Male
AAAYC7TM5	TGTCATT	519	United States, Oregon	Washington State University	Humulus lupulus var. lupulus	Male
AAAYC7TM5	CATGTTA	101	United States, Oregon	Washington State University	Humulus lupulus var. lupulus	Male
AAAYC7TM5	GCATAAGA	368	United States, Oregon	Washington State University	Humulus lupulus var. lupulus	Male
AAAYC7TM5	CGCTTAA	216	United States, Oregon	Washington State University	Humulus lupulus var. lupulus	Male
AAAYC7TM5	CTTGAC	312	United States, Oregon	Washington State University	Humulus lupulus var. lupulus	Male
AAAYC7TM5	CCGACCAT	643	United States, Oregon	Washington State University	Humulus lupulus var. lupulus	Male
AAAYC7TM5	GCAGTTC	508	United States, Oregon	Washington State University	Humulus lupulus var. lupulus	Male
AAAYC7TM5	TACGGTA	833	United States, Oregon	Washington State University	Humulus lupulus var. lupulus	Male
AAAYC7TM5	GACTATT	306	United States, Oregon	Washington State University	Humulus lupulus var. lupulus	Male
AAAYC7TM5	TAGCCAT	750	United States, Oregon	Washington State University	Humulus lupulus var. lupulus	Male
AAAYC7TM5	GAATTCT	282	United States, Oregon	USDA-ARS Corvallis, Oregon	Humulus lupulus var. lupulus	Male
AAAYC7TM5	TTCGCCA	43	United States, Oregon	USDA-ARS Corvallis, Oregon	Humulus lupulus var. lupulus	Male
AAAYC7TM5	CGGCTGGA	657	United States, Oregon	USDA-ARS Corvallis, Oregon	Humulus lupulus var. lupulus	Male
AAAYC7TM5	CATCGC	730	United States, Oregon	Washington State University	Humulus lupulus var. lupulus	Male
AAAYC7TM5	TTGCAGA	260	United States, Oregon	USDA-ARS Corvallis, Oregon	Humulus lupulus var. lupulus	Male
AAAYC7TM5	CGCCGAT	300	United States, Oregon	Washington State University	Humulus lupulus var. lupulus	Male
AAAYC7TM5	CCGAGCT	576	United States, Oregon	Washington State University	Humulus lupulus var. lupulus	Male
AAAYC7TM5	TAGTGC	469	United States, Oregon	USDA-ARS Corvallis, Oregon	Humulus lupulus var. lupulus	Male
AAAYC7TM5	TGCGCCGA	869	United States, Oregon	USDA-ARS Corvallis, Oregon	Humulus lupulus var. lupulus	Male
AAAYC7TM5	ACTCCGC	700	United States, Oregon	USDA-ARS Corvallis, Oregon	Humulus lupulus var. lupulus	Male
AAAYC7TM5	CACGACT	226	United States, Oregon	USDA-ARS Corvallis, Oregon	Humulus lupulus var. lupulus	Male
AAAYC7TM5	GTCAGTGT	876	United States, Oregon	USDA-ARS Corvallis, Oregon	Humulus lupulus var. lupulus	Male
AAAYC7TM5	ACCGGTC	294	United States, Oregon	USDA-ARS Corvallis, Oregon	Humulus lupulus var. lupulus	Male
AAAYCK2M5	TCCACGC	234	United States, Oregon	USDA-ARS NCGR, Corvallis, Oregon	Humulus lupulus var. lupulus	Female
AAAYCK2M5	AACTTGT	867	United States, Oregon	USDA-ARS NCGR, Corvallis, Oregon	Humulus lupulus var. lupulus	Female
AAAYCK2M5	AGCTA	620	United States, Oregon	USDA-ARS NCGR, Corvallis, Oregon	Humulus lupulus var. lupulus	Female
AAAYCK2M5	TAATTGC	200	United States, Oregon	USDA-ARS NCGR, Corvallis, Oregon	Humulus lupulus var. lupulus	Female
AAAYCK2M5	CGTGAAT	660	United States, Oregon	USDA-ARS NCGR, Corvallis, Oregon	Humulus lupulus var. lupulus	Female
AAAYCK2M5	CTAATGT	361	United States, Oregon	USDA-ARS NCGR, Corvallis, Oregon	Humulus lupulus var. lupulus	Female
AAAYCK2M5	TAAGCAGA	544	United States, Oregon	USDA-ARS NCGR, Corvallis, Oregon	Humulus lupulus var. lupulus	Female
AAAYCK2M5	GCATAAGA	861	United States, Oregon	USDA-ARS NCGR, Corvallis, Oregon	Humulus lupulus var. lupulus	Female
AAAYCK2M5	CCTACCGA	359	United States, Oregon	USDA-ARS NCGR, Corvallis, Oregon	Humulus lupulus var. lupulus	Male
AAAYCK2M5	GAATCTA	829	United States, Oregon	USDA-ARS NCGR, Corvallis, Oregon	Humulus lupulus var. lupulus	Female
AAAYCK2M5	GGTACAC	44	United States, Oregon	USDA-ARS NCGR, Corvallis, Oregon	Humulus lupulus var. lupulus	Female
AAAYCK2M5	AGTGGC	780	United States, Oregon	USDA-ARS NCGR, Corvallis, Oregon	Humulus lupulus var. lupulus	Female
AAAYCK2M5	ATGTCAA	17	United States, Oregon	USDA-ARS NCGR, Corvallis, Oregon	Humulus lupulus var. lupulus	Female
AAAYCK2M5	TGCAATA	795	United States, Oregon	USDA-ARS NCGR, Corvallis, Oregon	Humulus lupulus var. lupulus	Male
AAAYCK2M5	TCTAGGA	582	United States, Oregon	USDA-ARS NCGR, Corvallis, Oregon	Humulus lupulus var. lupulus	Female
AAAYCK2M5	AGGAGTC	852	United States, Oregon	USDA-ARS NCGR, Corvallis, Oregon	Humulus lupulus var. lupulus	Male
AAAYCK2M5	GACAATGA	400	United States, Oregon	USDA-ARS NCGR, Corvallis, Oregon	Humulus lupulus var. lupulus	Female
AAAYCK2M5	GCATTGA	753	United States, Oregon	USDA-ARS NCGR, Corvallis, Oregon	Humulus lupulus var. lupulus	Female
AAAYCK2M5	GTTACGA	495	United States, Oregon	USDA-ARS NCGR, Corvallis, Oregon	Humulus lupulus var. lupulus	Female
AAAYCK2M5	ACCGGTC	230	United States, Oregon	USDA-ARS NCGR, Corvallis, Oregon	Humulus lupulus var. lupulus	Female
AAAYCK2M5	AGTCTAT	403	United States, Oregon	USDA-ARS NCGR, Corvallis, Oregon	Humulus lupulus var. lupulus	Female
AAAYCKWM5	GTAGAGC	648	United States, Oregon	USDA-ARS Corvallis, Oregon	Humulus lupulus var. lupulus	Male
AAAYCKWM5	ATGCACC	849	United States, Oregon	USDA-ARS Corvallis, Oregon	Humulus lupulus var. lupulus	Male
AAAYCKWM5	TGCGCCGA	33	United States, Oregon	USDA-ARS Corvallis, Oregon	Humulus lupulus var. lupulus	Male
AAAYCKWM5	TTCGGAC	207	United States, Oregon	USDA-ARS Corvallis, Oregon	Humulus lupulus var. lupulus	Male
AAAYCKWM5	CAGCCT	374	United States, Oregon	USDA-ARS Corvallis, Oregon	Humulus lupulus var. lupulus	Male
AAAYCKWM5	GACAATGA	356	United States, Oregon	USDA-ARS Corvallis, Oregon	Humulus lupulus var. lupulus	Male
AAAYCKWM5	TTCGCCA	691	United States, Oregon	USDA-ARS Corvallis, Oregon	Humulus lupulus var. lupulus	Male
AAAYCKWM5	AGGC	482	United States, Oregon	USDA-ARS Corvallis, Oregon	Humulus lupulus var. lupulus	Male
AAAYCKWM5	TCATGAC	759	United States, Oregon	USDA-ARS Corvallis, Oregon	Humulus lupulus var. lupulus	Male
AAAYCKWM5	GAATCTA	316	United States, Oregon	USDA-ARS Corvallis, Oregon	Humulus lupulus var. lupulus	Male
AAAYCKWM5	CACGACT	614	United States, Oregon	USDA-ARS Corvallis, Oregon	Humulus lupulus var. lupulus	Male
AAAYCKWM5	TTAGACT	768	United States, Oregon	USDA-ARS Corvallis, Oregon	Humulus lupulus var. lupulus	Male
AAAYCKWM5	TGAGCGC	197	United States, Oregon	USDA-ARS Corvallis, Oregon	Humulus lupulus var. lupulus	Male
AAAYCKWM5	CGGCTGGA	16	United States, Oregon	USDA-ARS Corvallis, Oregon	Humulus lupulus var. lupulus	Male
AAAYCKWM5	CAGTTGA	25	United States, Oregon	USDA-ARS Corvallis, Oregon	Humulus lupulus var. lupulus	Male
AAAYCKWM5	TATGTAC	367	United States, Oregon	USDA-ARS Corvallis, Oregon	Humulus lupulus var. lupulus	Male
AAAYCKWM5	CATGTTA	391	United States, Oregon	USDA-ARS Corvallis, Oregon	Humulus lupulus var. lupulus	Male
AAAYCKWM5	GCCAGAT	812	United States, Oregon	USDA-ARS Corvallis, Oregon	Humulus lupulus var. lupulus	Male
AAAYCKWM5	ACTCCGC	638	United States, Oregon	USDA-ARS Corvallis, Oregon	Humulus lupulus var. lupulus	Male
AAAYCKWM5	GCATTGA	358	United States, Oregon	USDA-ARS Corvallis, Oregon	Humulus lupulus var. lupulus	Male
AAC23GLM5	ACGTC	121	United States, Oregon	Washington State University	Humulus lupulus var. lupulus	Female
AAC23GLM5	ATCAGAGA	241	United States, Oregon	Washington State University	Humulus lupulus var. lupulus	Female
AAC23GLM5	GTACTC	579	United States, Oregon	Washington State University	Humulus lupulus var. lupulus	Female
AAC23GLM5	TTGGCA	782	United States, Oregon	Washington State University	Humulus lupulus var. lupulus	Female
AAC23GLM5	GCCTAT	96	United States, Oregon	Washington State University	Humulus lupulus var. lupulus	Female
AAC23GLM5	TGAATC	336	United States, Oregon	Washington State University	Humulus lupulus var. lupulus	Female
AAC23GLM5	CGTTATA	416	United States, Oregon	Washington State University	Humulus lupulus var. lupulus	Male
AAC23GLM5	GCATGTGT	272	United States, Oregon	Washington State University	Humulus lupulus var. lupulus	Female
AAC23GLM5	CTTAGGTT	623	United States, Oregon	Washington State University	Humulus lupulus var. lupulus	Female
AAC23GLM5	GCTTCGGA	454	United States, Oregon	Washington State University	Humulus lupulus var. lupulus	Female
AAC23GLM5	GCTGGAC	765	United States, Oregon	Washington State University	Humulus lupulus var. lupulus	Female
AAC23GLM5	CATATGC	274	United States, Oregon	Washington State University	Humulus lupulus var. lupulus	Female
AAC23GLM5	GCTAC	85	United States, Oregon	Washington State University	Humulus lupulus var. lupulus	Female
AAC23GLM5	GACTC	820	United States, Oregon	Washington State University	Humulus lupulus var. lupulus	Female
AAC23GLM5	AAGTCTT	819	United States, Oregon	Washington State University	Humulus lupulus var. lupulus	Female
AAC23GLM5	CATGTGGT	75	United States, Oregon	Washington State University	Humulus lupulus var. lupulus	Female
AAC23GLM5	GTCGATA	515	United States, Oregon	Washington State University	Humulus lupulus var. lupulus	Female
AAC23GLM5	GCCATC	804	United States, Oregon	Washington State University	Humulus lupulus var. lupulus	Female
AAC23GLM5	CGCCTACA	653	United States, Oregon	Washington State University	Humulus lupulus var. lupulus	Female
AAC23GLM5	GTCC	666	United States, Oregon	Washington State University	Humulus lupulus var. lupulus	Female
AAC23GLM5	ATCCGGA	397	United States, Oregon	Washington State University	Humulus lupulus var. lupulus	Female
AAC23GLM5	TGACCT	431	United States, Oregon	Washington State University	Humulus lupulus var. lupulus	Female
AAC23GLM5	CAGCT	499	United States, Oregon	Washington State University	Humulus lupulus var. lupulus	Female
AAC23GLM5	CGCCAT	732	United States, Oregon	Washington State University	Humulus lupulus var. lupulus	Female
AAC23GLM5	TCCGTA	229	United States, Oregon	Washington State University	Humulus lupulus var. lupulus	Female
AAC23GLM5	ATCAGTT	751	United States, Oregon	Clean Plant Center Northwest, Prosser, Washington	Humulus lupulus var. lupulus	Female
AAC23GLM5	ACCTGC	427	United States, Oregon	Clean Plant Center Northwest, Prosser, Washington	Humulus lupulus var. lupulus	Female
AAC23GLM5	GCTTAGC	567	United States, Oregon	Clean Plant Center Northwest, Prosser, Washington	Humulus lupulus var. lupulus	Female
AAC23GLM5	TACGGTGT	257	United States, Oregon	Clean Plant Center Northwest, Prosser, Washington	Humulus lupulus var. lupulus	Female
AAC23GLM5	TTGCAC	61	United States, Oregon	Clean Plant Center Northwest, Prosser, Washington	Humulus lupulus var. lupulus	Female
AAC23GLM5	AGCAAGTA	557	United States, Oregon	Washington State University	Humulus lupulus var. lupulus	Female
AAC23GLM5	AGTCTGGT	26	United States, Oregon	Washington State University	Humulus lupulus var. lupulus	Female
AAC23GLM5	CGTCA	880	United States, Oregon	Washington State University	Humulus lupulus var. lupulus	Female
AAC23HHM5	TCAGC	176	United States, Oregon	Washington State University	Humulus lupulus var. lupulus	Female
AAC23HHM5	ATCGTC	158	United States, Oregon	Washington State University	Humulus lupulus var. lupulus	Female
AAC23HHM5	TTGGCA	569	United States, Oregon	Washington State University	Humulus lupulus var. lupulus	Female
AAC23HHM5	TGACCT	744	United States, Oregon	Washington State University	Humulus lupulus var. lupulus	Female
AAC23HHM5	AAGTCTT	809	United States, Oregon	Washington State University	Humulus lupulus var. lupulus	Female
AAC23HHM5	CAGCT	639	United States, Oregon	Washington State University	Humulus lupulus var. lupulus	Female
AAC23HHM5	CGCCTACA	37	United States, Oregon	Washington State University	Humulus lupulus var. lupulus	Female
AAC23HHM5	TGTTAC	627	United States, Oregon	Washington State University	Humulus lupulus var. lupulus	Female
AAC23HHM5	GCCATC	776	United States, Oregon	Washington State University	Humulus lupulus var. lupulus	Female
AAC23HHM5	TGACGTA	669	United States, Oregon	Washington State University	Humulus lupulus var. lupulus	Female
AAC23HHM5	TCGGAT	128	United States, Oregon	Washington State University	Humulus lupulus var. lupulus	Female
AAC23HHM5	TTGACTA	696	United States, Oregon	Washington State University	Humulus lupulus var. lupulus	Female
AAC23HHM5	CCGTAC	718	United States, Oregon	Washington State University	Humulus lupulus var. lupulus	Female
AAC23HHM5	GCATGTGT	273	United States, Oregon	Washington State University	Humulus lupulus var. lupulus	Female
AAC23HHM5	GCTGGAC	4	United States, Oregon	Washington State University	Humulus lupulus	Female
AAC23HHM5	GAGTCGC	533	United States, Oregon	Washington State University	Humulus lupulus var. lupulus	Female
AAC2LVKM5	GATT	728	United States, Oregon	Washington State University	Humulus lupulus var. lupulus	Male
AAC2LVKM5	TGTTAC	342	United States, Oregon	USDA-ARS Corvallis, Oregon	Humulus lupulus var. lupulus	Male
AAC2LVKM5	CTCCGA	578	United States, Oregon	Washington State University	Humulus lupulus var. lupulus	Male
AAC2LVKM5	AGAAGCAT	232	United States, Oregon	USDA-ARS Corvallis, Oregon	Humulus lupulus var. lupulus	Male
AAC2LVKM5	TTGGCA	525	United States, Oregon	Washington State University	Humulus lupulus var. lupulus	Male
AAC2LVKM5	CTGGAAC	189	United States, Oregon	Washington State University	Humulus lupulus var. lupulus	Male
AAC2LVKM5	TACGGTGT	148	United States, Oregon	Washington State University	Humulus lupulus var. lupulus	Male
AAC2LVKM5	TACGAGC	593	United States, Oregon	Washington State University	Humulus lupulus var. lupulus	Male
AAC2LVKM5	GCCTAT	685	United States, Oregon	Washington State University	Humulus lupulus var. lupulus	Male
AAC2LVKM5	TAAGCTT	859	United States, Oregon	Washington State University	Humulus lupulus var. lupulus	Male
AAC2LVKM5	AAGTCTT	248	United States, Oregon	USDA-ARS Corvallis, Oregon	Humulus lupulus var. lupulus	Male
AAC2LVKM5	TCATAGT	78	United States, Oregon	Washington State University	Humulus lupulus var. lupulus	Male
AAC2LVKM5	AGCAAGTA	568	United States, Oregon	Washington State University	Humulus lupulus var. lupulus	Male
AAC2LVKM5	GTCGATA	721	United States, Oregon	Washington State University	Humulus lupulus var. lupulus	Male
AAC2LVKM5	GACTC	15	United States, Oregon	Washington State University	Humulus lupulus var. lupulus	Male
AAC2LVKM5	GTATTAC	596	United States, Oregon	USDA-ARS Corvallis, Oregon	Humulus lupulus var. lupulus	Male
AAC2LVKM5	GATAGCT	202	United States, Oregon	Washington State University	Humulus lupulus var. lupulus	Male
AAC2LVKM5	TTCAAGT	196	United States, Oregon	Washington State University	Humulus lupulus var. lupulus	Male
AAC2LVKM5	CATTAGT	877	United States, Oregon	USDA-ARS Corvallis, Oregon	Humulus lupulus var. lupulus	Male
AAC2LVKM5	CTTAGGTT	860	United States, Oregon	Washington State University	Humulus lupulus var. lupulus	Male
AAC2LVKM5	TCCGTA	5	United States, Oregon	Washington State University	Humulus lupulus var. lupulus	Male
AAC2LVKM5	ACGCTGA	145	United States, Oregon	Washington State University	Humulus lupulus var. lupulus	Male
AAC2LVKM5	AGGTTAC	20	United States, Oregon	USDA-ARS Corvallis, Oregon	Humulus lupulus var. lupulus	Male
AAC2LVKM5	GCTTAGC	817	United States, Oregon	Washington State University	Humulus lupulus var. lupulus	Male
AAC2LVKM5	AGATACGA	493	United States, Oregon	Washington State University	Humulus lupulus var. lupulus	Male
AAC2LVKM5	GTCACT	13	United States, Oregon	Washington State University	Humulus lupulus var. lupulus	Male
AAC2LVKM5	CGACAGT	425	United States, Oregon	Washington State University	Humulus lupulus var. lupulus	Male
AAC2LVKM5	TTGACTA	267	United States, Oregon	Washington State University	Humulus lupulus var. lupulus	Male
AAC2LVKM5	CAGCT	224	United States, Oregon	Washington State University	Humulus lupulus var. lupulus	Male
AAC2LVKM5	TAAC	796	United States, Oregon	USDA-ARS Corvallis, Oregon	Humulus lupulus var. lupulus	Male
AAC2LVKM5	GTCC	107	United States, Oregon	Washington State University	Humulus lupulus var. lupulus	Male
AAC2LVKM5	GACGTGA	644	United States, Oregon	Washington State University	Humulus lupulus var. lupulus	Male
AAC2LVKM5	AGAGCAAT	195	United States, Oregon	Washington State University	Humulus lupulus var. lupulus	Male
AAC2LVKM5	TAGCGGC	18	United States, Oregon	Washington State University	Humulus lupulus var. lupulus	Male
AAC2LVKM5	TCGAGTGT	317	United States, Oregon	Washington State University	Humulus lupulus var. lupulus	Male
AAC2LVKM5	GCATGTGT	692	United States, Oregon	Washington State University	Humulus lupulus var. lupulus	Male
AAC2LVKM5	GCTTCGGA	674	United States, Oregon	USDA-ARS Corvallis, Oregon	Humulus lupulus var. lupulus	Male
AAC2LVKM5	ACGTC	688	United States, Oregon	Washington State University	Humulus lupulus var. lupulus	Male
AAC2LVKM5	GCAACGT	824	United States, Oregon	Washington State University	Humulus lupulus var. lupulus	Male
AAC2LVKM5	ATCCGGA	137	United States, Oregon	USDA-ARS Corvallis, Oregon	Humulus lupulus var. lupulus	Male
AAC2LVKM5	ATTGATC	828	United States, Oregon	USDA-ARS Corvallis, Oregon	Humulus lupulus var. lupulus	Male
AAC2LVKM5	TGCATAT	221	United States, Oregon	USDA-ARS Corvallis, Oregon	Humulus lupulus var. lupulus	Male
AAC2LVKM5	GCCATC	551	United States, Oregon	Washington State University	Humulus lupulus var. lupulus	Male
AAC2LVKM5	GTGCATGT	45	United States, Oregon	USDA-ARS Corvallis, Oregon	Humulus lupulus var. lupulus	Male
AAC2LVKM5	ATCGTC	825	United States, Oregon	USDA-ARS Corvallis, Oregon	Humulus lupulus var. lupulus	Male
AAC2LVKM5	ACGGCAT	591	United States, Oregon	USDA-ARS Corvallis, Oregon	Humulus lupulus var. lupulus	Male
AAC2LVKM5	TGGCAAC	498	United States, Oregon	USDA-ARS Corvallis, Oregon	Humulus lupulus var. lupulus	Male
AAC2LVKM5	ACCGT	108	United States, Oregon	USDA-ARS Corvallis, Oregon	Humulus lupulus var. lupulus	Male
AAC2LYVM5	AACTTGT	815	United States, Oregon	Washington State University	Humulus lupulus var. lupulus	Female
AAC2LYVM5	ATACAGGA	583	United States, Oregon	Washington State University	Humulus lupulus var. lupulus	Female
AAC2LYVM5	ATCTAGC	756	United States, Oregon	Washington State University	Humulus lupulus var. lupulus	Female
AAC2LYVM5	GCCAGAT	693	United States, Oregon	Washington State University	Humulus lupulus var. lupulus	Female
AAC2LYVM5	CGTGAAT	355	United States, Oregon	Washington State University	Humulus lupulus var. lupulus	Female
AAC2LYVM5	CATGTTA	757	United States, Oregon	Washington State University	Humulus lupulus var. lupulus	Female
AAC2LYVM5	TTGCAGA	184	United States, Oregon	Clean Plant Center Northwest, Prosser, Washington	Humulus lupulus var. lupulus	Female
AAC2LYVM5	CGGCTGGA	338	United States, Oregon	Clean Plant Center Northwest, Prosser, Washington	Humulus lupulus var. lupulus	Female
AAC5HTKM5	CGCCAT	90	United States, Oregon	Washington State University	Humulus lupulus var. lupulus	Female
AAC5HTKM5	GACTC	600	United States, Oregon	Washington State University	Humulus lupulus var. lupulus	Female
AAC5HTKM5	ATCGTC	217	United States, Oregon	Washington State University	Humulus lupulus var. lupulus	Female
AAC5HTKM5	CATTAGT	286	United States, Oregon	Washington State University	Humulus lupulus var. lupulus	Female
AAC5HTKM5	GTGCATGT	49	United States, Oregon	Washington State University	Humulus lupulus var. lupulus	Female
AAC5HTKM5	GCTGGAC	287	United States, Oregon	Washington State University	Humulus lupulus var. lupulus	Female
AAC5HTKM5	TTGACTA	354	United States, Oregon	Washington State University	Humulus lupulus var. lupulus	Female
AAC5HTKM5	CAATGAGA	334	United States, Oregon	Washington State University	Humulus lupulus var. lupulus	Female
AAC5HTKM5	TCATAGT	222	United States, Oregon	Washington State University	Humulus lupulus var. lupulus	Female
AAC5HTKM5	TGACCT	807	United States, Oregon	Washington State University	Humulus lupulus var. lupulus	Female
AAC5HTKM5	GAGTCGC	858	United States, Oregon	Washington State University	Humulus lupulus var. lupulus	Female
AAC5HTKM5	ATCAGAGA	461	United States, Oregon	Washington State University	Humulus lupulus var. lupulus	Female
AAC5HTKM5	GCAACGT	467	United States, Oregon	Washington State University	Humulus lupulus var. lupulus	Female
AAC5HTKM5	TGAATC	504	United States, Oregon	Washington State University	Humulus lupulus var. lupulus	Female
AAC5HTKM5	TACGCC	348	United States, Oregon	Washington State University	Humulus lupulus var. lupulus	Female
AAC5HTKM5	GATCATA	803	United States, Oregon	Washington State University	Humulus lupulus var. lupulus	Female
AAC5HTKM5	ACAT	747	United States, Oregon	Washington State University	Humulus lupulus var. lupulus	Female
AAC5HTKM5	ATCAGTT	235	United States, Oregon	Washington State University	Humulus lupulus var. lupulus	Female
AAC5HTKM5	GTCGATA	663	United States, Oregon	Washington State University	Humulus lupulus var. lupulus	Female
AAC5HTKM5	TGCATAT	370	United States, Oregon	Washington State University	Humulus lupulus var. lupulus	Female
AAC5HTKM5	GCTATAA	56	United States, Oregon	Washington State University	Humulus lupulus var. lupulus	Female
AAC5HTKM5	ACCGT	243	United States, Oregon	Washington State University	Humulus lupulus var. lupulus	Female
AAC5HV3M5	AGATACGA	423	United States, Oregon	Washington State University	Humulus lupulus var. lupulus	Female
AAC5HV3M5	GATGTC	818	United States, Oregon	Washington State University	Humulus lupulus var. lupulus	Female
AAC5HV3M5	AGCAAGTA	517	United States, Oregon	Washington State University	Humulus lupulus var. lupulus	Female
AAC5HV3M5	CTGATC	779	United States, Oregon	Washington State University	Humulus lupulus var. lupulus	Female
AAC5HV3M5	TGAATC	458	United States, Oregon	Washington State University	Humulus lupulus var. lupulus	Female
AAC5HV3M5	TGACGTA	574	United States, Oregon	Washington State University	Humulus lupulus var. lupulus	Female
AAC5HV3M5	CAGCT	450	United States, Oregon	Washington State University	Humulus lupulus var. lupulus	Female
AAC5HV3M5	CATTAGT	135	United States, Oregon	Washington State University	Humulus lupulus var. lupulus	Female
AAC5HV3M5	GCTAC	19	United States, Oregon	Washington State University	Humulus lupulus var. lupulus	Female
AAC5HV3M5	GCTGGAC	378	United States, Oregon	Washington State University	Humulus lupulus var. lupulus	Female
AAC5HV3M5	ATCGTC	173	United States, Oregon	Washington State University	Humulus lupulus var. lupulus	Female
AAC5HV3M5	TAAC	793	United States, Oregon	Washington State University	Humulus lupulus var. lupulus	Female
AAC5HV3M5	ACGGCAT	191	United States, Oregon	Washington State University	Humulus lupulus var. lupulus	Female
AAC5HV3M5	GCTTCGGA	421	United States, Oregon	Washington State University	Humulus lupulus var. lupulus	Female
AAC5HV3M5	GAGTCGC	409	United States, Oregon	Washington State University	Humulus lupulus var. lupulus	Female
AAC5HV3M5	GACTC	9	United States, Oregon	Washington State University	Humulus lupulus var. lupulus	Female
AAC5HV3M5	GCATCC	446	United States, Oregon	Washington State University	Humulus lupulus var. lupulus	Female
AAC5HV3M5	CAGTTA	714	United States, Oregon	Washington State University	Humulus lupulus var. lupulus	Female
AAC5HV3M5	GTTCCA	603	United States, Oregon	Washington State University	Humulus lupulus var. lupulus	Female
AAC5HV3M5	CTATGC	307	United States, Oregon	Washington State University	Humulus lupulus var. lupulus	Female
AAC5HV3M5	ACCTGC	841	United States, Oregon	Washington State University	Humulus lupulus var. lupulus	Female
AAC5HV3M5	CGTACC	703	United States, Oregon	Washington State University	Humulus lupulus var. lupulus	Female
AAC5HV3M5	CATGC	94	United States, Oregon	Washington State University	Humulus lupulus var. lupulus	Female
AAC5HV3M5	GATT	439	United States, Oregon	Washington State University	Humulus lupulus var. lupulus	Female
AAC5HV3M5	CCGTAC	110	United States, Oregon	Washington State University	Humulus lupulus var. lupulus	Female
AAC5HV3M5	CGTAGTGT	775	United States, Oregon	Washington State University	Humulus lupulus var. lupulus	Female
AAC5HV3M5	TGGCAAC	698	United States, Oregon	Washington State University	Humulus lupulus var. lupulus	Female
AAC5HV3M5	GCATGTGT	661	United States, Oregon	Washington State University	Humulus lupulus var. lupulus	Female
AAC5HV3M5	TCATAGT	402	United States, Oregon	Washington State University	Humulus lupulus var. lupulus	Female
AAC5HV3M5	CGAA	555	United States, Oregon	Washington State University	Humulus lupulus var. lupulus	Female
AAC5HV3M5	AAGTCTT	606	United States, Oregon	USDA-ARS NCGR, Corvallis, Oregon	Humulus lupulus var. lupulus	Male
AAC5HV3M5	CGTCA	420	United States, Oregon	USDA-ARS NCGR, Corvallis, Oregon	Humulus lupulus var. lupulus	Male
AAC5HV3M5	AATTGGC	684	United States, Oregon	Clean Plant Center Northwest, Prosser, Washington	Humulus lupulus var. lupulus	Female
AAC5HV3M5	TTGCAC	333	United States, Oregon	Clean Plant Center Northwest, Prosser, Washington	Humulus lupulus var. lupulus	Female
AAC5HVNM5	ATTGATC	522	United States, Oregon	Washington State University	Humulus lupulus var. lupulus	Female
AAC5HVNM5	TCAGC	444	United States, Oregon	Washington State University	Humulus lupulus var. lupulus	Female
AAC5HVNM5	TTGCAC	390	United States, Oregon	Washington State University	Humulus lupulus var. lupulus	Female
AAC5HVNM5	CGTCA	21	United States, Oregon	Washington State University	Humulus lupulus var. lupulus	Female
AAC5HVNM5	GCATGTGT	153	United States, Oregon	Washington State University	Humulus lupulus var. lupulus	Female
AAC5HVNM5	GTCGATA	451	United States, Oregon	Washington State University	Humulus lupulus var. lupulus	Female
AAC5HVNM5	GATAGCT	534	United States, Oregon	Washington State University	Humulus lupulus var. lupulus	Female
AAC5HVNM5	GACGTGA	805	United States, Oregon	Washington State University	Humulus lupulus var. lupulus	Female
AAC5HVNM5	GATT	155	United States, Oregon	Washington State University	Humulus lupulus var. lupulus	Female
AAC5HVNM5	TACGCC	785	United States, Oregon	Washington State University	Humulus lupulus var. lupulus	Female
AAC5HVNM5	ACGTC	647	United States, Oregon	Washington State University	Humulus lupulus var. lupulus	Female
AAC5HVNM5	GCTTAGC	854	United States, Oregon	Washington State University	Humulus lupulus var. lupulus	Female
AAC5HVNM5	TCATAGT	706	United States, Oregon	Washington State University	Humulus lupulus var. lupulus	Female
AAC5HVNM5	GCTATAA	141	United States, Oregon	Washington State University	Humulus lupulus var. lupulus	Female
AAC5HVNM5	GCAACGT	227	United States, Oregon	USDA-ARS NCGR, Corvallis, Oregon	Humulus lupulus var. lupulus	Female
AAC5HVNM5	ATCCGGA	1	United States, Oregon	Washington State University	Humulus lupulus var. lupulus	Female
AAC5HWMM5	ACGCTC	38	United States, Oregon	Washington State University	Humulus lupulus var. lupulus	Female
AAC5HWMM5	ATCAGTT	311	United States, Oregon	Washington State University	Humulus lupulus var. lupulus	Female
AAC5HWMM5	GTTCCA	87	United States, Oregon	Washington State University	Humulus lupulus var. lupulus	Female
AAC5HWMM5	AGACTGAA	777	United States, Oregon	Washington State University	Humulus lupulus var. lupulus	Female
AAC5HWMM5	CATATGC	826	United States, Oregon	Washington State University	Humulus lupulus var. lupulus	Female
AAC5HWMM5	GCCTAT	321	United States, Oregon	Washington State University	Humulus lupulus var. lupulus	Female
AAC5HWMM5	GACGTGA	457	United States, Oregon	Washington State University	Humulus lupulus var. lupulus	Female
AAC5HWMM5	CGAA	50	United States, Oregon	Washington State University	Humulus lupulus var. lupulus	Female
AAC5HWMM5	ATCGTC	179	United States, Oregon	Washington State University	Humulus lupulus var. lupulus	Female
AAC5HWMM5	CGACAGT	601	United States, Oregon	Washington State University	Humulus lupulus var. lupulus	Female
AAC5HWMM5	CTCGA	642	United States, Oregon	Washington State University	Humulus lupulus var. lupulus	Female
AAC5HWMM5	TCGGAT	349	United States, Oregon	Washington State University	Humulus lupulus var. lupulus	Female
AAC5HWMM5	GCTTCGGA	315	United States, Oregon	Washington State University	Humulus lupulus var. lupulus	Female
AAC5HWMM5	AGTGTGC	325	United States, Oregon	Washington State University	Humulus lupulus var. lupulus	Female
AAC5HWMM5	TAAGCTT	433	United States, Oregon	Washington State University	Humulus lupulus var. lupulus	Female
AAC5HWMM5	GTACTC	206	United States, Oregon	Washington State University	Humulus lupulus var. lupulus	Female
AAC5HWMM5	AGAAGCAT	29	United States, Oregon	Washington State University	Humulus lupulus var. lupulus	Female
AAC5HWMM5	AATTGGC	47	United States, Oregon	Washington State University	Humulus lupulus var. lupulus	Female
AAC5HWMM5	CTGATC	634	United States, Oregon	Washington State University	Humulus lupulus var. lupulus	Female
AAC5HWMM5	GCTATAA	537	United States, Oregon	Washington State University	Humulus lupulus var. lupulus	Female
AAC5HWMM5	GTGCATGT	154	United States, Oregon	Washington State University	Humulus lupulus var. lupulus	Female
AAC5HWMM5	GATCATA	443	United States, Oregon	Washington State University	Humulus lupulus var. lupulus	Female
AAC7WMGM5	GATCGTGT	405	United States, Oregon	Washington State University	Humulus lupulus var. lupulus	Female
AAC7WMGM5	CACGTT	104	United States, Oregon	Washington State University	Humulus lupulus var. lupulus	Female
AAC7WMGM5	CGCAT	738	United States, Oregon	Washington State University	Humulus lupulus var. lupulus	Female
AAC7WMGM5	CTAGCT	371	United States, Oregon	Washington State University	Humulus lupulus var. lupulus	Female
AAC7WMGM5	GCATAAGA	846	United States, Oregon	Washington State University	Humulus lupulus var. lupulus	Female
AAC7WMGM5	CGCTTAA	389	United States, Oregon	Washington State University	Humulus lupulus var. lupulus	Female
AAC7WMGM5	AGGC	115	United States, Oregon	Washington State University	Humulus lupulus var. lupulus	Female
AAC7WMGM5	AGGAGTC	292	United States, Oregon	Washington State University	Humulus lupulus var. lupulus	Female
AAC7WMGM5	TCTAGGA	584	United States, Oregon	Washington State University	Humulus lupulus var. lupulus	Female
AAC7WMGM5	GGCTAGA	489	United States, Oregon	Washington State University	Humulus lupulus var. lupulus	Female
AAC7WMGM5	ATATCGT	193	United States, Oregon	Washington State University	Humulus lupulus var. lupulus	Female
AAC7WMGM5	AACTTGT	161	United States, Oregon	Washington State University	Humulus lupulus var. lupulus	Female
AAC7WMGM5	TGAGCGC	724	United States, Oregon	Washington State University	Humulus lupulus var. lupulus	Female
AAC7WMGM5	GCCAGAT	339	United States, Oregon	Washington State University	Humulus lupulus var. lupulus	Female
AAC7WMGM5	AATGACGA	181	United States, Oregon	Washington State University	Humulus lupulus var. lupulus	Female
AAC7WMGM5	CTAATGT	697	United States, Oregon	Washington State University	Humulus lupulus var. lupulus	Female
AAC7WMGM5	TCCACGC	665	United States, Oregon	Washington State University	Humulus lupulus var. lupulus	Female
AAC7WMGM5	TGGTTCGA	246	United States, Oregon	Washington State University	Humulus lupulus var. lupulus	Female
AAC7WMGM5	TATGTAC	404	United States, Oregon	Washington State University	Humulus lupulus var. lupulus	Female
AAC7WMGM5	AGTTCGA	588	United States, Oregon	Washington State University	Humulus lupulus var. lupulus	Female
AAC7WMGM5	GAATCTA	23	United States, Oregon	Washington State University	Humulus lupulus var. lupulus	Female
AAC7WMGM5	CGCCGAT	659	United States, Oregon	Washington State University	Humulus lupulus var. lupulus	Female
AAC7WMGM5	CAGCGTA	695	United States, Oregon	Washington State University	Humulus lupulus var. lupulus	Female
AAC7WMGM5	GTTACGA	823	United States, Oregon	USDA-ARS NCGR, Corvallis, Oregon	Humulus lupulus var. lupulus	Male
AAC7WMGM5	CGGCTGGA	481	United States, Oregon	Washington State University	Humulus lupulus var. lupulus	Female
AAC23HHM5	GTCACT	139	United States, Vermont	Washington State University	Humulus lupulus var. lupulus	Female
AAC5HVNM5	GTTAGC	506	United States, Washington	Washington State University	Humulus lupulus var. lupulus	Female
AAC5HVNM5	ACGCTGA	322	United States, Washington	Washington State University	Humulus lupulus var. lupulus	Female
AAC5HVNM5	AAGTCTT	468	United States, Washington	Washington State University	Humulus lupulus var. lupulus	Female
AAC5HVNM5	ATCGTC	298	United States, Washington	Washington State University	Humulus lupulus var. lupulus	Female
AAC5HVNM5	CGGAGT	201	United States, Washington	Washington State University	Humulus lupulus var. lupulus	Female
AAC5HVNM5	GCCTAT	254	United States, Washington	Washington State University	Humulus lupulus var. lupulus	Female
AAC5HVNM5	GTCC	11	United States, Washington	Washington State University	Humulus lupulus var. lupulus	Female
AAC5HVNM5	CGTACC	478	United States, Washington	Washington State University	Humulus lupulus var. lupulus	Female
AAC5HVNM5	AATTGGC	729	United States, Washington	Washington State University	Humulus lupulus var. lupulus	Female
AAC5HWMM5	TCATAGT	266	United States, Washington	Washington State University	Humulus lupulus var. lupulus	Female
AAAYC7TM5	AGGC	388	United States, Washington	Washington State University	Humulus lupulus var. lupulus	Male
AAAYC7TM5	AGTTCGA	658	United States, Washington	Washington State University	Humulus lupulus var. lupulus	Male
AAAYC7TM5	GAATCTA	466	United States, Washington	Washington State University	Humulus lupulus var. lupulus	Male
AAAYC7TM5	TAATTGC	326	United States, Washington	Washington State University	Humulus lupulus var. lupulus	Male
AAAYC7TM5	ACGCCACT	345	United States, Washington	Washington State University	Humulus lupulus var. lupulus	Male
AAAYC7TM5	CACGTT	245	United States, Washington	Washington State University	Humulus lupulus var. lupulus	Male
AAAYC7TM5	TCGCGCA	766	United States, Washington	Washington State University	Humulus lupulus var. lupulus	Male
AAAYC7TM5	CAAGAAGT	35	United States, Washington	Washington State University	Humulus lupulus var. lupulus	Male
AAAYC7TM5	GCCAGAT	27	United States, Washington	Washington State University	Humulus lupulus var. lupulus	Male
AAAYC7TM5	CGGCTCA	440	United States, Washington	Washington State University	Humulus lupulus var. lupulus	Male
AAAYC7TM5	AAGAGACT	712	United States, Washington	Washington State University	Humulus lupulus var. lupulus	Male
AAAYC7TM5	CAGTTGA	503	United States, Washington	Washington State University	Humulus lupulus var. lupulus	Male
AAAYC7TM5	GTGTCAGT	120	United States, Washington	Washington State University	Humulus lupulus var. lupulus	Male
AAAYC7TM5	AGAGCCT	244	United States, Washington	Washington State University	Humulus lupulus var. lupulus	Male
AAAYC7TM5	ATGTCAA	330	United States, Washington	Washington State University	Humulus lupulus var. lupulus	Male
AAAYC7TM5	TAAGCAGA	383	United States, Washington	Washington State University	Humulus lupulus var. lupulus	Male
AAAYC7TM5	AACTTGT	532	United States, Washington	Washington State University	Humulus lupulus var. lupulus	Male
AAAYC7TM5	TGAGCGC	211	United States, Washington	Washington State University	Humulus lupulus var. lupulus	Male
AAAYC7TM5	ATTCAGT	63	United States, Washington	Washington State University	Humulus lupulus var. lupulus	Male
AAAYC7TM5	CAGCCT	598	United States, Washington	Washington State University	Humulus lupulus var. lupulus	Male
AAAYC7TM5	CGGTAGC	786	United States, Washington	Washington State University	Humulus lupulus var. lupulus	Male
AAAYC7TM5	GGTGGCA	830	United States, Washington	Washington State University	Humulus lupulus var. lupulus	Male
AAAYCK2M5	GTCATCA	842	United States, Washington	USDA-ARS NCGR, Corvallis, Oregon	Humulus lupulus var. lupulus	Female
AAAYCK2M5	CGCAT	509	United States, Washington	USDA-ARS NCGR, Corvallis, Oregon	Humulus lupulus var. lupulus	Female
AAAYCKWM5	AGCTA	170	United States, Washington	Washington State University	Humulus lupulus var. lupulus	Male
AAAYCKWM5	AGTCTAT	530	United States, Washington	Washington State University	Humulus lupulus var. lupulus	Male
AAAYCKWM5	GTCATCA	7	United States, Washington	Washington State University	Humulus lupulus var. lupulus	Male
AAAYCKWM5	GAATTCT	878	United States, Washington	Washington State University	Humulus lupulus var. lupulus	Male
AAAYCKWM5	TGGTTCGA	352	United States, Washington	Washington State University	Humulus lupulus var. lupulus	Male
AAAYCKWM5	TCTTAAGT	649	United States, Washington	Washington State University	Humulus lupulus var. lupulus	Male
AAAYCKWM5	CTAATGT	251	United States, Washington	Washington State University	Humulus lupulus var. lupulus	Male
AAAYCKWM5	ATCTAGC	408	United States, Washington	Washington State University	Humulus lupulus var. lupulus	Male
AAAYCKWM5	AGAGCCT	872	United States, Washington	Washington State University	Humulus lupulus var. lupulus	Male
AAAYCKWM5	GGTACAC	72	United States, Washington	Washington State University	Humulus lupulus var. lupulus	Male
AAAYCKWM5	TCTAGGA	249	United States, Washington	Washington State University	Humulus lupulus var. lupulus	Male
AAAYCKWM5	CTTGAC	71	United States, Washington	Washington State University	Humulus lupulus var. lupulus	Male
AAAYCKWM5	ATGTCAA	554	United States, Washington	Washington State University	Humulus lupulus var. lupulus	Male
AAAYCKWM5	CCAGTC	800	United States, Washington	Washington State University	Humulus lupulus var. lupulus	Male
AAAYCKWM5	CCGAGCT	487	United States, Washington	Washington State University	Humulus lupulus var. lupulus	Male
AAAYCKWM5	TGTCATT	418	United States, Washington	Washington State University	Humulus lupulus var. lupulus	Male
AAAYCKWM5	GTACTGGT	667	United States, Washington	Washington State University	Humulus lupulus var. lupulus	Male
AAAYCKWM5	ATGCGT	523	United States, Washington	Washington State University	Humulus lupulus var. lupulus	Male
AAAYCKWM5	AATGACGA	84	United States, Washington	Washington State University	Humulus lupulus var. lupulus	Male
AAAYCKWM5	GACTATT	635	United States, Washington	Washington State University	Humulus lupulus var. lupulus	Male
AAAYCKWM5	AGTGGC	645	United States, Washington	Washington State University	Humulus lupulus var. lupulus	Male
AAAYCKWM5	TGAATTC	130	United States, Washington	Washington State University	Humulus lupulus var. lupulus	Male
AAAYCKWM5	CATCGC	801	United States, Washington	Washington State University	Humulus lupulus var. lupulus	Male
AAAYCKWM5	CCTACCGA	125	United States, Washington	Washington State University	Humulus lupulus var. lupulus	Male
AAAYCKWM5	GGACCTT	699	United States, Washington	Washington State University	Humulus lupulus var. lupulus	Male
AAAYCKWM5	CCACACGT	428	United States, Washington	Washington State University	Humulus lupulus var. lupulus	Male
AAAYCKWM5	TCCACGC	710	United States, Washington	Washington State University	Humulus lupulus var. lupulus	Male
AAAYCKWM5	ATATCGT	164	United States, Washington	Washington State University	Humulus lupulus var. lupulus	Male
AAAYCKWM5	GCATAAGA	470	United States, Washington	Washington State University	Humulus lupulus var. lupulus	Male
AAAYCKWM5	GTCTGAA	92	United States, Washington	Washington State University	Humulus lupulus var. lupulus	Male
AAAYCKWM5	TCGCGCA	590	United States, Washington	Washington State University	Humulus lupulus var. lupulus	Male
AAAYCKWM5	GCGTAAT	432	United States, Washington	Washington State University	Humulus lupulus var. lupulus	Male
AAAYCKWM5	AACTTGT	767	United States, Washington	Washington State University	Humulus lupulus var. lupulus	Male
AAAYCKWM5	TACTGAT	650	United States, Washington	Washington State University	Humulus lupulus var. lupulus	Male
AAAYCKWM5	TTGATAC	166	United States, Washington	Washington State University	Humulus lupulus var. lupulus	Male
AAAYCKWM5	TCGTTAA	301	United States, Washington	Washington State University	Humulus lupulus var. lupulus	Male
AAAYCKWM5	TAATTGC	865	United States, Washington	Washington State University	Humulus lupulus var. lupulus	Male
AAAYCKWM5	AGTTCGA	875	United States, Washington	Washington State University	Humulus lupulus var. lupulus	Male
AAAYCKWM5	GGTGGCA	203	United States, Washington	Washington State University	Humulus lupulus var. lupulus	Male
AAAYCKWM5	CTTAGAT	572	United States, Washington	Washington State University	Humulus lupulus var. lupulus	Male
AAAYCKWM5	CGCAT	429	United States, Washington	Washington State University	Humulus lupulus var. lupulus	Male
AAC23GLM5	GTTCCA	769	United States, Washington	Washington State University	Humulus lupulus var. lupulus	Female
AAC23GLM5	ACGCTGA	57	United States, Washington	Washington State University	Humulus lupulus var. lupulus	Female
AAC23GLM5	ACCGT	671	United States, Washington	Washington State University	Humulus lupulus var. lupulus	Female
AAC23GLM5	AGATACGA	175	United States, Washington	Clean Plant Center Northwest, Prosser, Washington	Humulus lupulus var. lupulus	Female
AAC23GLM5	AGTGTGC	843	United States, Washington	Clean Plant Center Northwest, Prosser, Washington	Humulus lupulus var. lupulus	Female
AAC23GLM5	TAGGTCA	625	United States, Washington	Clean Plant Center Northwest, Prosser, Washington	Humulus lupulus var. lupulus	Female
AAC23GLM5	TCAAGTT	136	United States, Washington	Washington State University	Humulus lupulus var. lupulus	Female
AAC23GLM5	TCATAGT	521	United States, Washington	Washington State University	Humulus lupulus var. lupulus	Female
AAC23GLM5	TGCATAT	501	United States, Washington	Washington State University	Humulus lupulus var. lupulus	Female
AAC23GLM5	AGACTGAA	99	United States, Washington	Washington State University	Humulus lupulus var. lupulus	Female
AAC23GLM5	CCACCTGA	362	United States, Washington	Washington State University	Humulus lupulus var. lupulus	Female
AAC23GLM5	TAGCGGC	239	United States, Washington	Washington State University	Humulus lupulus var. lupulus	Female
AAC23GLM5	CGACAGT	868	United States, Washington	Washington State University	Humulus lupulus var. lupulus	Female
AAC23GLM5	TGACGTA	490	United States, Washington	Washington State University	Humulus lupulus var. lupulus	Female
AAC23GLM5	GCTATAA	708	United States, Washington	Washington State University	Humulus lupulus var. lupulus	Female
AAC23GLM5	GACGTGA	198	United States, Washington	Washington State University	Humulus lupulus var. lupulus	Female
AAC23GLM5	CATTAGT	167	United States, Washington	Washington State University	Humulus lupulus var. lupulus	Female
AAC23GLM5	GTGCATGT	14	United States, Washington	Washington State University	Humulus lupulus var. lupulus	Female
AAC23GLM5	TTACGAT	277	United States, Washington	Washington State University	Humulus lupulus var. lupulus	Female
AAC23GLM5	GCAACGT	749	United States, Washington	Clean Plant Center Northwest, Prosser, Washington	Humulus lupulus var. lupulus	Female
AAC23GLM5	CGGAGT	150	United States, Washington	Clean Plant Center Northwest, Prosser, Washington	Humulus lupulus var. lupulus	Female
AAC23HHM5	TCGAGTGT	31	United States, Washington	Washington State University	Humulus lupulus var. lupulus	Female
AAC23HHM5	CATTAGT	379	United States, Washington	Washington State University	Humulus lupulus	Female
AAC23HHM5	ATCAGAGA	275	United States, Washington	Washington State University	Humulus lupulus	Female
AAC23HHM5	ACGCTC	711	United States, Washington	Washington State University	Humulus lupulus	Female
AAC23HHM5	CTCGA	527	United States, Washington	Washington State University	Humulus lupulus	Female
AAC23HHM5	GTCC	276	United States, Washington	Washington State University	Humulus lupulus	Female
AAC23HHM5	AGCAAGTA	838	United States, Washington	Washington State University	Humulus lupulus	Female
AAC23HHM5	CTCCGA	204	United States, Washington	Washington State University	Humulus lupulus var. lupulus	Female
AAC23HHM5	GCTATAA	76	United States, Washington	Washington State University	Humulus lupulus var. lupulus	Female
AAC23HHM5	ACCGT	735	United States, Washington	Washington State University	Humulus lupulus var. lupulus	Female
AAC23HHM5	GCTTAGC	502	United States, Washington	Washington State University	Humulus lupulus var. lupulus	Female
AAC23HHM5	ACGCTGA	58	United States, Washington	Washington State University	Humulus lupulus var. lupulus	Female
AAC23HHM5	TACGGTGT	66	United States, Washington	Washington State University	Humulus lupulus var. lupulus	Female
AAC23HHM5	AGAAGCAT	280	United States, Washington	Washington State University	Humulus lupulus var. lupulus	Female
AAC23HHM5	TTACGAT	263	United States, Washington	Washington State University	Humulus lupulus var. lupulus	Female
AAC23HHM5	GTTAGC	79	United States, Washington	Washington State University	Humulus lupulus var. lupulus	Female
AAC23HHM5	GTTCCA	424	United States, Washington	Washington State University	Humulus lupulus var. lupulus	Female
AAC23HHM5	GTGCATGT	134	United States, Washington	Washington State University	Humulus lupulus var. lupulus	Female
AAC23HHM5	GATT	159	United States, Washington	Washington State University	Humulus lupulus var. lupulus	Female
AAC23HHM5	GCCTAT	377	United States, Washington	Washington State University	Humulus lupulus var. lupulus	Female
AAC23HHM5	TCATAGT	218	United States, Washington	Washington State University	Humulus lupulus var. lupulus	Female
AAC23HHM5	ACAT	675	United States, Washington	Washington State University	Humulus lupulus var. lupulus	Female
AAC23HHM5	GATGTC	366	United States, Washington	Washington State University	Humulus lupulus var. lupulus	Female
AAC2LVKM5	TCAAGTT	676	United States, Washington	Washington State University	Humulus lupulus var. lupulus	Male
AAC2LVKM5	GCTATAA	190	United States, Washington	Washington State University	Humulus lupulus var. lupulus	Male
AAC2LVKM5	CGAA	413	United States, Washington	Washington State University	Humulus lupulus var. lupulus	Male
AAC2LVKM5	CAATGAGA	86	United States, Washington	Washington State University	Humulus lupulus var. lupulus	Male
AAC2LVKM5	CTCGA	318	United States, Washington	Washington State University	Humulus lupulus var. lupulus	Male
AAC2LVKM5	TACGCC	814	United States, Washington	Washington State University	Humulus lupulus var. lupulus	Male
AAC2LVKM5	TCAGC	616	United States, Washington	Washington State University	Humulus lupulus var. lupulus	Male
AAC2LVKM5	ATCAGTT	791	United States, Washington	Washington State University	Humulus lupulus var. lupulus	Male
AAC2LVKM5	AGTGTGC	199	United States, Washington	Washington State University	Humulus lupulus var. lupulus	Male
AAC2LVKM5	AGTCTGGT	278	United States, Washington	Washington State University	Humulus lupulus var. lupulus	Male
AAC2LVKM5	TAGGTCA	857	United States, Washington	Washington State University	Humulus lupulus var. lupulus	Male
AAC2LVKM5	CGTTATA	474	United States, Washington	Washington State University	Humulus lupulus var. lupulus	Male
AAC2LVKM5	ATCAGAGA	435	United States, Washington	Washington State University	Humulus lupulus var. lupulus	Male
AAC2LVKM5	CGTCA	149	United States, Washington	Washington State University	Humulus lupulus var. lupulus	Male
AAC2LVKM5	CATGTGGT	705	United States, Washington	Washington State University	Humulus lupulus var. lupulus	Male
AAC2LVKM5	ACCTGC	816	United States, Washington	Washington State University	Humulus lupulus var. lupulus	Male
AAC2LVKM5	ACGCTC	285	United States, Washington	Washington State University	Humulus lupulus var. lupulus	Male
AAC2LVKM5	AGACTGAA	174	United States, Washington	Washington State University	Humulus lupulus var. lupulus	Male
AAC2LVKM5	GCATCC	73	United States, Washington	Washington State University	Humulus lupulus var. lupulus	Male
AAC2LYVM5	GGACCTT	384	United States, Washington	Washington State University	Humulus lupulus var. lupulus	Female
AAC2LYVM5	TCTAGGA	185	United States, Washington	Washington State University	Humulus lupulus var. lupulus	Female
AAC2LYVM5	GCATTGA	434	United States, Washington	Washington State University	Humulus lupulus var. lupulus	Female
AAC2LYVM5	ATGTCAA	82	United States, Washington	Washington State University	Humulus lupulus var. lupulus	Female
AAC2LYVM5	GCGTAAT	2	United States, Washington	Washington State University	Humulus lupulus var. lupulus	Female
AAC2LYVM5	TGTCATT	631	United States, Washington	Washington State University	Humulus lupulus var. lupulus	Female
AAC2LYVM5	CAGTTGA	709	United States, Washington	Washington State University	Humulus lupulus var. lupulus	Female
AAC2LYVM5	CTAATGT	736	United States, Washington	Washington State University	Humulus lupulus var. lupulus	Female
AAC2LYVM5	TAATTGC	799	United States, Washington	Washington State University	Humulus lupulus var. lupulus	Female
AAC5HTKM5	TCCGTA	681	United States, Washington	Washington State University	Humulus lupulus var. lupulus	Female
AAC5HTKM5	AGACTGAA	763	United States, Washington	Washington State University	Humulus lupulus var. lupulus	Female
AAC5HTKM5	GATAGCT	571	United States, Washington	Washington State University	Humulus lupulus var. lupulus	Female
AAC5HTKM5	TTGGCA	228	United States, Washington	Washington State University	Humulus lupulus var. lupulus	Female
AAC5HTKM5	CAGTGAC	605	United States, Washington	Washington State University	Humulus lupulus var. lupulus	Female
AAC5HTKM5	AGGTTAC	483	United States, Washington	Washington State University	Humulus lupulus var. lupulus	Female
AAC5HTKM5	GCTAC	372	United States, Washington	Washington State University	Humulus lupulus var. lupulus	Female
AAC5HTKM5	TGACGTA	265	United States, Washington	Washington State University	Humulus lupulus var. lupulus	Female
AAC5HTKM5	GCATCC	543	United States, Washington	Washington State University	Humulus lupulus var. lupulus	Female
AAC5HTKM5	TAGCGGC	171	United States, Washington	Washington State University	Humulus lupulus var. lupulus	Female
AAC5HTKM5	AGATACGA	233	United States, Washington	Washington State University	Humulus lupulus var. lupulus	Female
AAC5HTKM5	CGGAGT	401	United States, Washington	Washington State University	Humulus lupulus var. lupulus	Female
AAC5HTKM5	CGACAGT	70	United States, Washington	Washington State University	Humulus lupulus var. lupulus	Female
AAC5HTKM5	CAGTTA	770	United States, Washington	Washington State University	Humulus lupulus var. lupulus	Female
AAC5HTKM5	ACGCTGA	436	United States, Washington	Washington State University	Humulus lupulus var. lupulus	Female
AAC5HTKM5	CTTAGGTT	607	United States, Washington	Washington State University	Humulus lupulus var. lupulus	Female
AAC5HTKM5	CGAA	151	United States, Washington	Washington State University	Humulus lupulus var. lupulus	Female
AAC5HTKM5	TCGAGTGT	546	United States, Washington	Washington State University	Humulus lupulus var. lupulus	Female
AAC5HTKM5	GTTCCA	760	United States, Washington	Washington State University	Humulus lupulus var. lupulus	Female
AAC5HTKM5	ACCTGC	524	United States, Washington	Washington State University	Humulus lupulus var. lupulus	Female
AAC5HTKM5	TTACGAT	500	United States, Washington	Washington State University	Humulus lupulus var. lupulus	Female
AAC5HTKM5	TAAC	847	United States, Washington	Washington State University	Humulus lupulus var. lupulus	Female
AAC5HTKM5	ATCCGGA	399	United States, Washington	Washington State University	Humulus lupulus var. lupulus	Female
AAC5HTKM5	CCGTAC	713	United States, Washington	Washington State University	Humulus lupulus var. lupulus	Female
AAC5HTKM5	CGTACC	69	United States, Washington	Washington State University	Humulus lupulus var. lupulus	Female
AAC5HTKM5	TCGGAT	844	United States, Washington	Washington State University	Humulus lupulus var. lupulus	Female
AAC5HTKM5	TGGCAAC	610	United States, Washington	Washington State University	Humulus lupulus var. lupulus	Female
AAC5HTKM5	ACGCTC	553	United States, Washington	Washington State University	Humulus lupulus var. lupulus	Female
AAC5HTKM5	GCCTAT	562	United States, Washington	Washington State University	Humulus lupulus var. lupulus	Female
AAC5HTKM5	CTCGA	169	United States, Washington	Washington State University	Humulus lupulus var. lupulus	Female
AAC5HTKM5	CTGATC	12	United States, Washington	Washington State University	Humulus lupulus var. lupulus	Female
AAC5HTKM5	AGTCTGGT	520	United States, Washington	Washington State University	Humulus lupulus var. lupulus	Female
AAC5HTKM5	TAGGTCA	396	United States, Washington	Washington State University	Humulus lupulus var. lupulus	Female
AAC5HV3M5	CGGAGT	781	United States, Washington	Washington State University	Humulus lupulus var. lupulus	Female
AAC5HV3M5	ATCAGAGA	350	United States, Washington	Washington State University	Humulus lupulus var. lupulus	Female
AAC5HV3M5	GCAACGT	426	United States, Washington	Clean Plant Center Northwest, Prosser, Washington	Humulus lupulus var. lupulus	Female
AAC5HV3M5	AGTCTGGT	694	United States, Washington	USDA-ARS NCGR, Corvallis, Oregon	Humulus lupulus var. lupulus	Female
AAC5HV3M5	GATCATA	618	United States, Washington	Washington State University	Humulus lupulus var. lupulus	Female
AAC5HV3M5	ACCGT	376	United States, Washington	Washington State University	Humulus lupulus var. lupulus	Female
AAC5HV3M5	CAGTGAC	293	United States, Washington	Washington State University	Humulus lupulus var. lupulus	Female
AAC5HV3M5	TTGACTA	407	United States, Washington	Washington State University	Humulus lupulus var. lupulus	Female
AAC5HV3M5	TGCATAT	415	United States, Washington	Washington State University	Humulus lupulus var. lupulus	Female
AAC5HV3M5	AGACTGAA	633	United States, Washington	Washington State University	Humulus lupulus var. lupulus	Female
AAC5HV3M5	ATCCGGA	123	United States, Washington	Washington State University	Humulus lupulus var. lupulus	Female
AAC5HV3M5	GTCC	59	United States, Washington	Washington State University	Humulus lupulus var. lupulus	Female
AAC5HV3M5	GTCGATA	802	United States, Washington	Washington State University	Humulus lupulus var. lupulus	Female
AAC5HV3M5	CAATGAGA	412	United States, Washington	Washington State University	Humulus lupulus var. lupulus	Female
AAC5HV3M5	TAGGTCA	442	United States, Washington	Washington State University	Humulus lupulus var. lupulus	Female
AAC5HV3M5	TGACCT	441	United States, Washington	Washington State University	Humulus lupulus var. lupulus	Female
AAC5HV3M5	CATATGC	192	United States, Washington	Washington State University	Humulus lupulus var. lupulus	Female
AAC5HV3M5	ACGTC	341	United States, Washington	Washington State University	Humulus lupulus var. lupulus	Female
AAC5HV3M5	ACAT	188	United States, Washington	Washington State University	Humulus lupulus var. lupulus	Female
AAC5HV3M5	AGTGTGC	873	United States, Washington	Washington State University	Humulus lupulus var. lupulus	Female
AAC5HV3M5	CTTAGGTT	564	United States, Washington	Washington State University	Humulus lupulus var. lupulus	Female
AAC5HV3M5	TAAGCTT	626	United States, Washington	Washington State University	Humulus lupulus var. lupulus	Female
AAC5HV3M5	GTGCATGT	394	United States, Washington	Washington State University	Humulus lupulus var. lupulus	Female
AAC5HV3M5	GACGTGA	734	United States, Washington	Washington State University	Humulus lupulus var. lupulus	Female
AAC5HVNM5	GAGTCGC	845	United States, Washington	Washington State University	Humulus lupulus var. lupulus	Female
AAC5HVNM5	AGAGCAAT	492	United States, Washington	Washington State University	Humulus lupulus var. lupulus	Female
AAC5HVNM5	AGACTGAA	612	United States, Washington	Washington State University	Humulus lupulus var. lupulus	Female
AAC5HVNM5	TACGAGC	414	United States, Washington	Washington State University	Humulus lupulus var. lupulus	Female
AAC5HVNM5	TAAGCTT	856	United States, Washington	Washington State University	Humulus lupulus var. lupulus	Female
AAC5HVNM5	CCGTAC	302	United States, Washington	Washington State University	Humulus lupulus var. lupulus	Female
AAC5HVNM5	CGAA	516	United States, Washington	Washington State University	Humulus lupulus var. lupulus	Female
AAC5HVNM5	ATCAGAGA	447	United States, Washington	Washington State University	Humulus lupulus var. lupulus	Female
AAC5HVNM5	TTCAAGT	566	United States, Washington	Washington State University	Humulus lupulus var. lupulus	Female
AAC5HWMM5	TGGCAAC	284	United States, Washington	Washington State University	Humulus lupulus var. lupulus	Female
AAC5HWMM5	CTCCGA	67	United States, Washington	Washington State University	Humulus lupulus var. lupulus	Female
AAC5HWMM5	CATTAGT	393	United States, Washington	Washington State University	Humulus lupulus var. lupulus	Female
AAC5HWMM5	ACAT	702	United States, Washington	Washington State University	Humulus lupulus var. lupulus	Female
AAC5HWMM5	AGATACGA	112	United States, Washington	Washington State University	Humulus lupulus var. lupulus	Female
AAC5HWMM5	GTCC	806	United States, Washington	Washington State University	Humulus lupulus var. lupulus	Female
AAC5HWMM5	TGACCT	822	United States, Washington	Washington State University	Humulus lupulus var. lupulus	Female
AAC5HWMM5	TTGCAC	834	United States, Washington	Washington State University	Humulus lupulus var. lupulus	Female
AAC5HWMM5	GCTGGAC	668	United States, Washington	Washington State University	Humulus lupulus var. lupulus	Female
AAC5HWMM5	TCAAGTT	636	United States, Washington	Washington State University	Humulus lupulus var. lupulus	Female
AAC5HWMM5	CGTCA	385	United States, Washington	Washington State University	Humulus lupulus var. lupulus	Female
AAC5HWMM5	CAGTGAC	604	United States, Washington	Washington State University	Humulus lupulus var. lupulus	Female
AAC5HWMM5	CGCCTACA	552	United States, Washington	Washington State University	Humulus lupulus var. lupulus	Male
AAC5HWMM5	GTCGATA	652	United States, Washington	Washington State University	Humulus lupulus var. lupulus	Female
AAC5HWMM5	ACGCTGA	411	United States, Washington	Washington State University	Humulus lupulus var. lupulus	Female
AAC5HWMM5	AGCAAGTA	165	United States, Washington	Washington State University	Humulus lupulus var. lupulus	Female
AAC5HWMM5	AGTCTGGT	126	United States, Washington	Washington State University	Humulus lupulus var. lupulus	Female
AAC5HWMM5	GATT	704	United States, Washington	Washington State University	Humulus lupulus var. lupulus	Female
AAC5HWMM5	ATCCGGA	299	United States, Washington	Washington State University	Humulus lupulus var. lupulus	Female
AAC5HWMM5	CATGTGGT	381	United States, Washington	Washington State University	Humulus lupulus var. lupulus	Female
AAC7WMGM5	TGTCATT	592	United States, Washington	Washington State University	Humulus lupulus var. lupulus	Female
AAC7WMGM5	ATTAGCA	258	United States, Washington	Washington State University	Humulus lupulus var. lupulus	Female
AAC7WMGM5	CCACACGT	789	United States, Washington	Washington State University	Humulus lupulus var. lupulus	Female
AAC7WMGM5	CGGCTCA	122	United States, Washington	Washington State University	Humulus lupulus var. lupulus	Female
AAC7WMGM5	ATACAGGA	716	United States, Washington	Washington State University	Humulus lupulus var. lupulus	Female
AAC7WMGM5	TAGTGC	737	United States, Washington	Washington State University	Humulus lupulus var. lupulus	Female
AAC7WMGM5	TTGCAGA	100	United States, Washington	Washington State University	Humulus lupulus var. lupulus	Female
AAC7WMGM5	GCATTGA	289	United States, Washington	Washington State University	Humulus lupulus var. lupulus	Female
AAC7WMGM5	GGACCTT	720	United States, Washington	Washington State University	Humulus lupulus var. lupulus	Female
AAC7WMGM5	AGTGGC	60	United States, Washington	Washington State University	Humulus lupulus var. lupulus	Female
AAC7WMGM5	TCTTGTGA	180	United States, Washington	Washington State University	Humulus lupulus var. lupulus	Female
AAC7WMGM5	TCGTTAA	573	United States, Washington	Washington State University	Humulus lupulus var. lupulus	Female
AAC7WMGM5	GCGA	264	United States, Washington	Washington State University	Humulus lupulus var. lupulus	Female
AAC7WMGM5	GTACTGGT	68	United States, Washington	Washington State University	Humulus lupulus var. lupulus	Female
AAC7WMGM5	ATGCGT	417	United States, Washington	Washington State University	Humulus lupulus var. lupulus	Female
AAC7WMGM5	TTCGGAC	580	United States, Washington	Washington State University	Humulus lupulus var. lupulus	Female
AAC7WMGM5	CGTGAAT	559	United States, Washington	Washington State University	Humulus lupulus var. lupulus	Female
AAC7WMGM5	ACCGCT	863	United States, Washington	Washington State University	Humulus lupulus var. lupulus	Female
AAC7WMGM5	CCTACCGA	629	United States, Washington	Washington State University	Humulus lupulus var. lupulus	Female
AAC23GLM5	ATCGTC	597	Unknown	Washington State University	Humulus lupulus	Female
AAC23HHM5	CTTAGGTT	486	Unknown	Washington State University	Humulus lupulus var. lupulus	Female
AAC2LVKM5	TGAATC	455	Unknown	Washington State University	Humulus lupulus var. lupulus	Male
AAC2LVKM5	AATTGGC	51	Unknown	Washington State University	Humulus lupulus var. lupulus	Male
AAC2LYVM5	GACAATGA	382	Unknown	Washington State University	Humulus lupulus var. lupulus	Female
AAC5HTKM5	ACGTC	449	Unknown	Unknown	Humulus lupulus var. lupulus	Female
AAC5HTKM5	TTCAAGT	832	Unknown	Washington State University	Humulus lupulus var. lupulus	Female
AAC5HVNM5	CCACCTGA	160	Unknown	Washington State University	Humulus lupulus var. lupulus	Female
AAC5HVNM5	CAGTTA	194	Unknown	Washington State University	Humulus lupulus var. lupulus	Female
AAC5HVNM5	TGACGTA	512	Unknown	Washington State University	Humulus lupulus var. lupulus	Female
AAC5HVNM5	AGTGTGC	456	Unknown	Washington State University	Humulus lupulus var. lupulus	Female
AAC5HVNM5	CTGATC	808	Unknown	Washington State University	Humulus lupulus var. lupulus	Female
AAC5HVNM5	GTCACT	586	Unknown	Washington State University	Humulus lupulus var. lupulus	Female
AAC5HVNM5	CGCCTACA	851	Unknown	Washington State University	Humulus lupulus var. lupulus	Female
AAC5HWMM5	TAAC	855	Unknown	Washington State University	Humulus lupulus var. lupulus	Female
AAC5HWMM5	TACGGTGT	89	Unknown	Washington State University	Humulus lupulus var. lupulus	Female
AAC5HWMM5	AAGTCTT	30	Unknown	Washington State University	Humulus lupulus var. lupulus	Female
AAC7WMGM5	TTCGCCA	717	Unknown	Washington State University	Humulus lupulus var. lupulus	Female
AAC7WMGM5	GTCATCA	835	Unknown	Washington State University	Humulus lupulus var. lupulus	Female
AAC7WMGM5	TACTGAT	40	Unknown	Washington State University	Humulus lupulus var. lupulus	Female
AAC7WMGM5	AGCTA	788	Unknown	Washington State University	Humulus lupulus var. lupulus	Female
AAC23HHM5	CGTTATA	210	Yugoslavia	Washington State University	Humulus lupulus var. lupulus	Female
AAC23HHM5	TGGCAAC	672	Yugoslavia	Washington State University	Humulus lupulus var. lupulus	Female
AAC23HHM5	ATCCGGA	742	Yugoslavia	Washington State University	Humulus lupulus var. lupulus	Female
AAC23HHM5	GATAGCT	773	Yugoslavia	Washington State University	Humulus lupulus var. lupulus	Female
AAC23HHM5	CAATGAGA	105	Yugoslavia	Washington State University	Humulus lupulus var. lupulus	Female
AAC23HHM5	TAGCGGC	445	Yugoslavia	Washington State University	Humulus lupulus var. lupulus	Female
AAC2LVKM5	CTATGC	480	Yugoslavia	Washington State University	Humulus lupulus var. lupulus	Male
AAC2LYVM5	TGGTTCGA	686	Yugoslavia	Washington State University	Humulus lupulus var. lupulus	Female
AAC5HVNM5	TGCATAT	640	Yugoslavia	Washington State University	Humulus lupulus var. lupulus	Female
AAC5HVNM5	TACGGTGT	186	Yugoslavia	Washington State University	Humulus lupulus var. lupulus	Female
AAC5HVNM5	ACAT	22	Yugoslavia	USDA-ARS NCGR, Corvallis, Oregon	Humulus lupulus var. lupulus	Female
AAC5HWMM5	TGACGTA	262	Yugoslavia	Washington State University	Humulus lupulus var. lupulus	Female
AAC5HWMM5	CTGGAAC	281	Yugoslavia	Washington State University	Humulus lupulus var. lupulus	Female
AAC5HWMM5	TCGAGTGT	680	Yugoslavia	Washington State University	Humulus lupulus var. lupulus	Female
AAC5HWMM5	GATGTC	114	Yugoslavia	Washington State University	Humulus lupulus var. lupulus	Female
AAC5HWMM5	GCATCC	587	Yugoslavia	Washington State University	Humulus lupulus var. lupulus	Female
AAC5HWMM5	TTGGCA	209	Yugoslavia	Washington State University	Humulus lupulus var. lupulus	Female
AAC5HWMM5	CGCCAT	313	Yugoslavia	Washington State University	Humulus lupulus var. lupulus	Female
AAC7WMGM5	AAGAGACT	505	Yugoslavia	Washington State University	Humulus lupulus var. lupulus	Female
AAC7WMGM5	ATGTCAA	752	Yugoslavia	Washington State University	Humulus lupulus var. lupulus	Female
AAC7WMGM5	GTGTCAGT	343	Yugoslavia	Washington State University	Humulus lupulus var. lupulus	Female
